# Supplementary material for: Association of coagulation dysfunction with cardiac injury among hospitalized patients with COVID-19
Source: PubMed Central journal article supplement (PMC7904824; doi:10.1038/s41598-021-83822-9), 2021-02-24
Supplement: 41598_2021_83822_MOESM1_ESM.pdf [file 41598_2021_83822_MOESM1_ESM.pdf]

# Supplemental Materials

## Association of Coagulation Dysfunction with Cardiac Injury Among Hospitalized Patients with COVID-19

*Short Title: Cardiac Injury and coagulation in COVID-19*

Liang Chen, MD, PhD,<sup>a\*</sup> Wei Hu, MD<sup>b\*</sup>, Xiaoxiao Guo, MD<sup>b\*</sup>, Ping Zhao, MS<sup>c</sup>, Jia Tang, MD<sup>b</sup>, Yuwei Gu, MD<sup>b</sup>, Ninghao Huang, BS<sup>c</sup>, Chao Wang, MS<sup>b</sup>, An Cui, MS<sup>b</sup>, Dian Zhang, MD<sup>b</sup>, Linjie Hu, BS<sup>c</sup>, Yi Feng, PhD<sup>d</sup>, Shengshou Hu, MD<sup>a</sup>, Mingquan Chen, MD<sup>b#</sup>, Firat Duru, MD<sup>e,#</sup>, Chenglong Xiong, PhD<sup>c,g#</sup>

<sup>a</sup>State Key Laboratory of Cardiovascular Disease, Fuwai Hospital, National Center for Cardiovascular Diseases, Chinese Academy of Medical Sciences and Peking Union Medical College, Beijing, China; <sup>b</sup>Department of Emergency, Huashan Hospital, Fudan University, Shanghai, China; <sup>c</sup>Department of Epidemiology, School of Public Health, Fudan University, Shanghai, China; <sup>d</sup>Department of Integrative Medicine and Neurobiology, School of Basic Medical Sciences, Fudan University, Shanghai, China; <sup>e</sup>Department of Cardiology, University Heart Center, Zurich, Switzerland; <sup>f</sup>Center for Integrative Human Physiology, University of Zurich, Zurich, Switzerland; <sup>g</sup>Key Laboratory of Public Health Safety, Ministry of Education, School of Public Health, Fudan University, Shanghai, China;

\*These authors contributed equally to this work  
Prof. Shengshou Hu worked as senior author.

### # Address for correspondence

Prof. Chenglong Xiong, 130 Dong'an Road, Shanghai 200032, China, Tel: +86 21 54230297, Fax: +86 21 54237237, xiongchenglong@fudan.edu.cn

Prof. Dr. Mingquan Chen, 12 Middle Urumqi Road, Shanghai 200040, China, Tel: +86 21 54237435, Fax: +86 21 54237435, mingquanchen@fudan.edu.cn

Prof. Dr. Firat Duru, Raemistrasse 100, Zurich CH-8091, Switzerland, Tel: +41 44 2553565, Fax: +41 44 2554401, firat.duru@usz.ch

**Table S1. Clinical characteristics of COVID-19 patients (survivors and non-survivors)**

| <b>Characteristics</b>                          | <b>Total<br/>(n=181)</b> | <b>Survivors<br/>(n=147)</b> | <b>Non-survivors<br/>(n=34)</b> | <b>P value</b> |
|-------------------------------------------------|--------------------------|------------------------------|---------------------------------|----------------|
| Male                                            | 102 (56.4)               | 81 (55.1)                    | 21 (61.8)                       | 0.481          |
| Age, years                                      | 55 (46,65)               | 53 (43,64)                   | 64.5 (53,71)                    | <0.001         |
| Heart rate                                      | 88 (80,96)               | 87 (80,94)                   | 94 (84,103)                     | 0.033          |
| Systolic pressure,<br>mmHg                      | 128 (116,142)            | 127 (116,141)                | 133.5 (115,144)                 | 0.729          |
| Diastolic pressure,<br>mmHg                     | 80 (72,85)               | 80 (72,85)                   | 79 (70,85)                      | 0.462          |
| Signs and comorbidities, n(%)                   |                          |                              |                                 |                |
| Fever                                           | 155 (85.6)               | 124 (84.4)                   | 31 (91.2)                       | 0.42           |
| Cough                                           | 139 (76.8)               | 111 (75.5)                   | 28 (82.4)                       | 0.396          |
| Chest tightness                                 | 90 (49.7)                | 67 (45.6)                    | 23 (67.6)                       | 0.021          |
| Palpitation                                     | 4 (2.2)                  | 3 (2)                        | 1 (2.9)                         | 0.568          |
| Dyspnea                                         | 81 (44.8)                | 61 (41.5)                    | 20 (58.8)                       | 0.068          |
| Fatigue                                         | 75 (41.4)                | 63 (42.9)                    | 12 (35.3)                       | 0.421          |
| Sputum                                          | 51 (28.2)                | 36 (24.5)                    | 15 (44.1)                       | 0.022          |
| Muscle ache                                     | 14 (7.7)                 | 14 (9.5)                     | 0 (0)                           | 0.075          |
| Diarrhea                                        | 16 (8.8)                 | 13 (8.8)                     | 3 (8.8)                         | 1              |
| Chest pain                                      | 5 (2.8)                  | 4 (2.7)                      | 1 (2.9)                         | 1              |
| Headache                                        | 10 (5.5)                 | 9 (6.1)                      | 1 (2.9)                         | 0.69           |
| Sore throat                                     | 10 (5.5)                 | 8 (5.4)                      | 2 (5.9)                         | 1              |
| Hypertension                                    | 54 (29.8)                | 42 (28.6)                    | 12 (35.3)                       | 0.441          |
| Diabetes                                        | 29 (16)                  | 25 (17)                      | 4 (11.8)                        | 0.454          |
| Coronary heart disease                          | 8 (4.4)                  | 5 (3.4)                      | 3 (8.8)                         | 0.173          |
| Arrhythmias                                     | 5 (2.8)                  | 3 (2)                        | 2 (5.9)                         | 0.237          |
| COPD                                            | 8 (4.4)                  | 3 (2)                        | 5 (14.7)                        | 0.007          |
| Cancer                                          | 7 (3.9)                  | 4 (2.7)                      | 3 (8.8)                         | 0.124          |
| Infective disease                               | 10 (5.5)                 | 8 (5.4)                      | 2 (5.9)                         | 1              |
| Lab findings, median (IQR)                      |                          |                              |                                 |                |
| SpO2 (%)                                        | 96 (90,98)               | 97 (93,98)                   | 88 (77,94)                      | <0.001         |
| Leukocytes, / $\mu$ L                           | 5.61 (4.08,8.48)         | 5.27 (3.87,7.48)             | 8.49 (5.33,11.26)               | 0.001          |
| Erythrocytes, / $\mu$ L                         | 4.19 (3.86,4.56)         | 4.22 (3.9,4.56)              | 4.08 (3.69,4.59)                | 0.239          |
| Hemoglobin, g/dL                                | 129 (117,136)            | 129 (119,137)                | 118 (112,131)                   | 0.046          |
| Platelets, / $\mu$ L                            | 191 (147,251)            | 194 (153,269)                | 145.5 (98,224)                  | 0.001          |
| Lymphocytes, / $\mu$ L                          | 0.98 (0.67,1.61)         | 1.17 (0.8,1.72)              | 0.66 (0.45,0.87)                | <0.001         |
| Creatinine, $\mu$ mol/L                         | 68.4 (56.7,81.7)         | 68 (56.8,79.5)               | 70.8 (55.9,93)                  | 0.331          |
| eGFR,<br>xmL/(min $\times$ 1.73m <sup>2</sup> ) | 106.13<br>(91.02,127.69) | 109.25<br>(93.72,126.45)     | 102.22<br>(83.01,138.85)        | 0.374          |
| Albumin, g/L                                    | 33.1 (29.2,36.5)         | 33.5 (30.5,37.3)             | 28.7 (25.8,33.1)                | <0.001         |

|                                    |                            |                           |                          |        |
|------------------------------------|----------------------------|---------------------------|--------------------------|--------|
| Total bilirubin, $\mu\text{mol/L}$ | 12.6 (9.4,15.9)            | 12.4 (9.4,15.4)           | 14.15 (9.4,23.4)         | 0.12   |
| AST, U/L                           | 34 (25,45)                 | 32 (25,41)                | 43 (32,52)               | 0.004  |
| ALT, U/L                           | 33 (22,46)                 | 32 (20,46)                | 34.5 (25,53)             | 0.289  |
| Cholesterol, mmol/L                | 3.88 (3.19,4.53)           | 3.92 (3.22,4.55)          | 3.82 (3.07,4.36)         | 0.27   |
| Triglyceride, mmol/L               | 1.2 (0.93,1.76)            | 1.2 (0.9,1.77)            | 1.14 (1,1.69)            | 0.671  |
| LDL-C, mmol/L                      | 2.21 (1.74,2.65)           | 2.22 (1.75,2.65)          | 2.21 (1.56,2.74)         | 0.812  |
| HDL-C, mmol/L                      | 1.03 (0.82,1.23)           | 1.08 (0.88,1.24)          | 0.82 (0.76,1.14)         | 0.005  |
| LDH,U/L                            | 270 (214,402)              | 248 (204,356)             | 421.5 (318,689)          | <0.001 |
| hs-CRP, mg/L <sup>*</sup>          | 25.9 (6.2,86.7)            | 15.1 (4.2,66.4)           | 82.35 (40,160)           | <0.001 |
| Procalcitonin, ng/mL               | 5 (5,10)                   | 5 (5,5)                   | 12.5 (5,36)              | <0.001 |
| D-dimer, $\mu\text{g/mL}$          | 0.73 (0.36,2.95)           | 0.58 (0.3,1.49)           | 6.02 (1.69,22.47)        | <0.001 |
| Serum ferritin, ng/mL <sup>†</sup> | 609.88<br>(304.31,1217.78) | 495.33<br>(277.37,938.18) | 1398.89<br>(861.25,2000) | <0.001 |
| ESR, mm/h                          | 42 (27.3,63)               | 39.2 (26.8,59)            | 52.35 (43,73)            | <0.001 |
| Interleukin 6, pg/mL               | 8.65 (6.65,12.17)          | 8.32 (6.32,11.91)         | 10.19 (8.34,15.26)       | 0.015  |
| hs-Tnl, pg/mL                      | 3.9 (1.2,12.5)             | 3.3 (1,9.4)               | 14.35 (6.9,185.3)        | <0.001 |
| Myohemoglobin, ng/mL               | 46.8 (28.2,88.25)          | 39.6 (26.4,75.4)          | 124.2 (74.4,289.9)       | <0.001 |
| BNP, pg/mL                         | 31.1 (10.03,77.37)         | 31.1 (10,62.82)           | 85.6 (34.7,269)          | <0.001 |
| Creatine kinase, U/L               | 84 (55,163)                | 82 (51,147)               | 136.5 (67,349)           | 0.01   |
| CK-MB, U/L                         | 14 (10,18)                 | 13 (10,17)                | 17.5 (13,24)             | <0.001 |

ALT: alanine aminotransferase; AST: aspartate transaminase; BNP: B-type natriuretic peptide; CK-MB: creatine kinase-myocardial band; COPD: chronic obstructive pulmonary disease; eGFR: estimated glomerular filtration rate; ESR: erythrocyte sedimentation rate; HDL-C: high density lipoprotein cholesterol; hs-CRP: high-sensitivity C-reaction protein; LDH: Lactic dehydrogenase; LDL-C: low density lipoprotein cholesterol. <sup>\*</sup>Extra levels of hs-CRP were shown as >160; <sup>†</sup>extra levels of serum ferritin were shown as >2000.

**Table S2. Univariate and multivariate logistic regression analysis of prediction of cardiac injury among COVID-19 patients.**

| Variables      | Univariate       |                | Multivariate        |                |
|----------------|------------------|----------------|---------------------|----------------|
|                | OR (95%CI)       | <i>P</i> value | OR (95%CI)          | <i>P</i> value |
| Gender         | 2.70 (1.26,5.80) | 0.011          |                     | 0.455          |
| Age            | 1.04 (1.01,1.07) | 0.002          | 1.06 (1.02,1.10)    | 0.002          |
| SpO2           | 0.94 (0.91,0.97) | <0.001         |                     | 0.281          |
| Leukocytes     | 1.13 (1.05,1.22) | 0.002          | 1.080 (1.004,1.156) | 0.051          |
| Platelets      | 0.99 (0.99,1.00) | 0.006          |                     | 0.072          |
| Lymphocytes    | 1.01 (0.96,1.05) | 0.806          |                     | 0.860          |
| LDH            | 1.01 (1.00,1.01) | <0.001         |                     | 0.394          |
| hs-CRP         | 1.01 (1.01,1.02) | <0.001         |                     | 0.776          |
| PCT            | 1.00 (1.00,1.00) | 0.824          |                     | 0.151          |
| D-dimer        | 1.13 (1.07,1.19) | <0.001         | 1.083 (1.030,1.139) | 0.001          |
| Serum ferritin | 1.00 (1.00,1.00) | <0.001         | 1.002 (1.001,1.003) | <0.001         |
| ESR            | 1.01 (0.99,1.02) | 0.214          |                     | 0.228          |
| IL6            | 1.03 (0.98,1.08) | 0.212          |                     | 0.934          |
